# Supplementary material for: USP17 mediates macrophage-promoted inflammation and stemness in lung cancer cells by regulating TRAF2/TRAF3 complex formation
Source: PubMed Central journal article supplement (PMC6283856; doi:10.1038/s41388-018-0411-0), 2018-07-23

**USP17 mediates macrophage-promoted inflammation and stemness in lung cancer cells by regulating TRAF2/TRAF3 complex formation**

**Chih-Hao Lu<sup>1,2</sup> • Da-Wei Yeh<sup>1</sup> • Chao-Yang Lai<sup>1</sup> • Yi-Ling Liu<sup>1</sup> • Li-Rung Huang<sup>3</sup> • Alan Yueh-Luen Lee<sup>4</sup> • S.-L. Catherine Jin<sup>2</sup> • Tsung-Hsien Chuang<sup>1,5</sup>**

<sup>1</sup>Immunology Research Center, National Health Research Institutes, Miaoli, Taiwan

<sup>2</sup>Department of Life Sciences, National Central University, Zhongli District, Taoyuan City, Taiwan

<sup>3</sup>Institute of Molecular and Genomic Medicine, National Health Research Institutes, Miaoli, Taiwan

<sup>4</sup>National Institute of Cancer Research, National Health Research Institutes, Miaoli, Taiwan

<sup>5</sup>Program in Environmental and Occupational Medicine, Kaohsiung Medical University  
Kaohsiung, Taiwan

Tsung-Hsien Chuang  
thchuang@nhri.org.tw

## **Supplementary Materials and Methods**

### **Reagents and antibodies**

Antibodies against human c-Rel, and mouse Cluster of differentiation (CD) 68 and CD206 were purchased from Abcam (Cambridge, UK). Anti-human IRF5 and NIK antibodies were purchased from Cell Signaling Technology, Inc. (Danvers, MA, USA). Anti-human USP17 antibodies were purchased from Abcam and OriGene (Rockville, MD, USA). Anti-mouse USP17 antibody was purchased from abnova (Taipei City, Taiwan). Anti-mouse TRAF2 and TRAF3 antibodies were purchased from Abcam. Anti-mouse CD117, CD133, CD145 and F4/80 antibodies were from BioLegend (San Diego, CA, USA). Recombinant human TNF- $\alpha$ , IFN- $\gamma$ , IL-1 $\beta$ , IL-4, IL-6, IL-8, IL-10, CXCL12, CCL22, EGF, and FGF were purchased from Peprotech (Rocky Hill, NJ, USA). Anti-Flag antibody and chemical reagents were purchased from Sigma-Aldrich Corp. (St. Louis, MO, USA). Reagents for the luciferase assay were purchased from Promega Corp. (Madison, WI, USA). Lung cancer cDNA array was purchased from OriGene (Rockville, MD, USA).

### **Plasmid construction**

Expression constructs for human USP17, TNFR-associated factor (TRAF) 2, and TRAF3 were generated through polymerase chain reaction (PCR) amplification of the corresponding protein-coding regions from a first-strand cDNA library derived from human spleen cells. Expression vectors for USP17 mutants and double mutants were generated by two-step PCR amplification. The amplified DNA fragments were cloned into the pRK5 vector for protein expression.

### **Transfection and luciferase-reporter analysis**

For NF- $\kappa$ B activation assays, HEK293 cells were cotransfected with an NF- $\kappa$ B-driven luciferase-reporter plasmid and the indicated expression plasmids using polyethylenimine. The next day, the cells were treated with different stimuli for 7 h, followed by lysis of the cells and the determination of luciferase activity. Relative luciferase activities were calculated as fold inductions relative to unstimulated controls.

### **Immunoblotting and co-immunoprecipitation analysis**

Protein extracts were prepared from whole cells. The cells were lysed with Nonidet P (NP)-40 lysis buffer (100 mM NaCl, 50 mM Tris-Cl pH 7.5, 0.5 mM ethylenediaminetetraacetic acid, 1% NP-40) containing complete protease inhibitor cocktail (Roche Life Science, Penzberg, Germany). The cell lysates were separated by sodium dodecyl sulfate-polyacrylamide gel

electrophoresis and transferred to polyvinyl difluoride membranes (Santa Cruz Biotechnology, Dallas, Texas, USA). The membranes were blocked for 1 h with 5% skimmed milk in TBST buffer (50 mM Tris-Cl pH 7.5, 150 mM NaCl, 0.1% Tween-20) and incubated for 1 h with the indicated primary antibodies in TBST containing 2% skimmed milk. The membranes were subsequently washed in TBST and incubated for 1 h with horseradish peroxidase (HRP)-conjugated secondary antibodies. The immune-reactive bands were visualized using a chemiluminescent HRP substrate and UVP BioSpectrum Imaging System.  $\beta$ -actin was used as a loading control. For immunoprecipitation (IP) and co-IP, the cell lysates were incubated with the indicated antibodies plus Protein A/G Magnetic Beads (Thermo Fisher Scientific, Waltham, MA, USA) at 4°C overnight to form immunocomplexes. After extensive washing with lysis buffer, the immunocomplexes were analyzed by immunoblotting.

### **Anchorage-independent growth**

Bottom agar–medium mixture (DMEM, 10% FBS, 0.8% agarose) was added to each well of six-well cell culture plates and allowed to solidify. Top agar–medium mixture (DMEM, 10% FBS, 0.4% agarose) containing cells was added, followed by the addition of growth medium, and incubated at 37°C. To photograph and count the colonies, the plates were fixed with 4% formaldehyde and stained with 0.005% crystal violet in phosphate-buffered saline for 1 h.

### **Cell proliferation assay**

Cell proliferation was measured by the CellTiter 96 AQueous Non-Radioactive Cell Proliferation (MTS) assay (Promega Corp.). The cells were cultured in medium for different periods of time. MTS/PMS solution was then added to each well. After 2 h, the absorbances at 490 nm were measured using an EnVision multilabel plate reader (PerkinElmer, Waltham, MA, USA).

### **Supplementary figure legends:**

**Supplementary Table 1.** Clinical data of patients with lung cancer for the cDNA array samples. cDNA array prepared from the data of patients with lung cancer was purchased from OriGene Technologies, Inc. (MD, USA) for the analysis of USP17 expression and correlation of its expression with the expression of inflammatory and macrophage markers in normal and lung cancer samples. These clinical data were provided by the manufacturer.

**Supplementary Table 2.** Sequences of forward and reverse primers used for the real-time quantitative polymerase chain reaction analysis of human and mouse genes.

**Supplementary Figure 1.** Correlation between the expression of ubiquitin-specific peptidase 17 and inflammatory and macrophage markers in lung cancers. Data in Fig. 1c–e were analyzed by the Pearson's correlation coefficient for determining the correlation of the expression of USP17 with (a) inflammatory markers and (b) macrophage markers in lung cancers.

**Supplementary Figure 2.** Induction of ubiquitin-specific peptidase 17 expression in lung cancer cells by different cytokines. (a) Human H1299 lung cancer cells and (b) mouse D121 lung cancer cells were treated with different concentrations of different cytokines for 1 h. Induction of ubiquitin-specific peptidase 17 was analyzed by real-time quantitative polymerase chain reaction. Data represent mean  $\pm$  standard deviation of three independent experiments, \*\* $P < 0.01$  compared with the time 0 group.

**Supplementary Figure 3.** Transcription factor binding sites in the promoter region of ubiquitin-specific peptidase 17. A 2-kb promoter region of ubiquitin-specific peptidase 17 (USP17) was analyzed by computer software from the Gene Promoter Miner website (<http://gpminer.mbc.nctu.edu.tw/>). Key transcription factors that mediate cytokine-induced gene activations, including HIF-1, STAT3, STAT6, and NF- $\kappa$ B, are shown. The arrowhead shows the transcriptional start site of USP17. The nucleotide position of the binding site is shown in parenthesis. The red bar indicates a reverse-strand binding site, and the blue bar indicates a forward-strand binding site.

**Supplementary Figure 4.** Expression of ubiquitin-specific peptidase 17 in different stable cell lines. Expression levels of ubiquitin-specific peptidase 17 (USP17) in (a) H1299, (b) D121, and (c) LLC cells stably transfected with control, overexpression or shRNA knockdown vector. Expression levels were detected by immunoblotting with specific antibodies as indicated. The blots shown represent a set of three independent blots with similar results.

**Supplementary Figure 5.** Effect of USP17 on IL-1 $\beta$ -induced NF- $\kappa$ B activation. **(a)** H1299 cells stably overexpressing ubiquitin-specific peptidase 17 (USP17) or stably transfected with control vector were transfected with NF- $\kappa$ B-controlled luciferase reporter gene and treated with or without 10 ng/ml interleukin (IL)-1 $\beta$ . These cells were lysed, and the relative luciferase activities were analyzed. Data represent mean  $\pm$  standard deviation of three independent experiments, \*\*P < 0.01. **(b)** H1299 cells stably overexpressing USP17 or stably transfected with control vector were treated with or without 10 ng/ml IL-1 $\beta$ . The expression of USP17 in these cells was analyzed by immunoblotting with specific antibodies as indicated. The blots shown are representative of three independent experiments..

**Supplementary Figure 6.** Cell surface expression of stemness markers in ubiquitin-specific peptidase 17 stably overexpressing cells. D121 cells stably transfected with control or ubiquitin-specific peptidase 17 overexpression vector were analyzed by flow cytometry for the percentage of cells with detectable CD117 and CD133 cancer stem cell markers on the cell surface. Data represent mean  $\pm$  standard deviation of three independent analyses, \*\*P < 0.01 compared with control.

**Supplementary Figure 7.** Ubiquitin-specific peptidase 17 expression enhances the proliferation and anchorage-independent growth of lung cancer cells. **(a, b)** Ubiquitin-specific peptidase 17 was stably overexpressed in human H1299 and mouse D121 lung cancer cells, and their abilities to undergo cell proliferation (a) and anchorage-independent colony formation (b) were analyzed. Top panels of b indicate representative plates showing colony formation. Bottom bar figures of b indicate enumeration of colonies. Data represent mean  $\pm$  standard deviation of three independent experiments, \*P < 0.05; \*\*P < 0.01 compared with the time 0 group (a) and the control group (b).

**Supplementary Figure 8.** Interaction between ubiquitin-specific peptidase 17 and TNFR-associated factor 2 and TNFR-associated factor 3 in Lewis lung cancer cells. **(a)** To determine the endogenous interaction, the endogenous ubiquitin-specific peptidase 17 (USP17) was immunoprecipitated from lysates of Lewis lung cancer (LLC) cells with anti-USP17 antibody. Immunoprecipitates (left panels) and original cell lysates (right panels) were subjected to immunoblotting using anti-TNFR-associated factor 2, anti-TNFR-associated factor 3, and anti-USP17 antibody as indicated. The blots shown are representative of three independent experiments. **(b)** To determine the requirement of TRAF2 and TRAF3 binding for regulating nuclear factor- $\kappa$ B (NF- $\kappa$ B) activation by USP17. Lewis lung cancer cells were cotransfected with an NF- $\kappa$ B-controlled luciferase-reporter plasmid and expression vectors encoding wt USP17 and different USP17 mutants as indicated. These cells were treated with or without interleukin (IL)-1 $\beta$  (10 ng/ml), and the relative luciferase activities were analyzed. **(c)** To

determine the requirement of deubiquitinase activity of USP17 for regulating NF- $\kappa$ B activation, LLC cells were cotransfected with an NF- $\kappa$ B-controlled luciferase-reporter plasmid and expression vectors encoding wt USP17 and C89S USP17. These cells were treated with or without IL-1 $\beta$  (10 ng/ml), and the relative luciferase activities were analyzed. The data in b and c represent mean  $\pm$  standard deviation of three independent experiments, \*\*P < 0.01.

**Supplementary Figure 9.** Efficiency of clodronate-containing liposomes in the depletion of mouse macrophages. C57BL/6J mice were injected with 200  $\mu$ l of clodronate-containing liposomes and blood samples were collected on the next day. The whole blood cells were incubated with APC-conjugated anti-CD45 antibody for leukocytes and PE-conjugated anti-F4/80 antibody for macrophages. The population of macrophages in blood cells was analyzed by flow cytometry. The histograms shown are representative of three independent experiments. Bar figure, the data represent mean  $\pm$  standard deviation (n = 3), \*\*P < 0.01.

Supplementary table 1

| Number | Gender | Age | Tissue of (Origin/Finding)                      | Appearance | SAMPLE diagnosis from pathology verification  | CASE diagnosis from Donor Institution pathology report | Tumor Grade                        | Minimum Stage Grouping |
|--------|--------|-----|-------------------------------------------------|------------|-----------------------------------------------|--------------------------------------------------------|------------------------------------|------------------------|
| 1      | F      | 67  | Lung / Lung                                     | Normal     | Within normal limits                          | Carcinoma of lung, squamous cell                       | Not Applicable                     | Not Applicable         |
| 2      | M      | 67  | Lung / Lung                                     | Normal     | Within normal limits                          | Carcinoma of lung, squamous cell                       | Not Applicable                     | Not Applicable         |
| 3      | F      | 74  | Lung / Lung                                     | Normal     | Within normal limits                          | Adenocarcinoma of lung, bronchioloalveolar             | Not Applicable                     | Not Applicable         |
| 4      | M      | 58  | Lung / Lung                                     | Normal     | Within normal limits                          | Carcinoma of lung, large cell, neuroendocrine          | Not Applicable                     | Not Applicable         |
| 5      | M      | 44  | Lung / Lung                                     | Normal     | Within normal limits                          | Carcinoma of lung, squamous cell                       | Not Applicable                     | Not Applicable         |
| 6      | M      | 61  | Lung / Lung                                     | Normal     | Within normal limits                          | Adenocarcinoma of lung                                 | Not Applicable                     | Not Applicable         |
| 7      | M      | 45  | Lung / Lung                                     | Normal     | Within normal limits                          | Malignant melanoma, metastatic                         | Not Applicable                     | Not Applicable         |
| 8      | M      | 68  | Lung / Lung                                     | Tumor      | Carcinoma of lung, squamous cell              | Carcinoma of lung, squamous cell                       | Not Reported                       | I                      |
| 9      | M      | 69  | Lung / Lung                                     | Tumor      | Adenocarcinoma of lung                        | Adenocarcinoma of lung                                 | AJCC G2: Moderately differentiated | I                      |
| 10     | M      | 51  | Lung / Lung                                     | Tumor      | Adenocarcinoma of lung, papillary             | Adenocarcinoma of lung, papillary                      | Not Reported                       | I                      |
| 11     | M      | 62  | Lung / Lung                                     | Tumor      | Carcinoma of lung, squamous cell              | Carcinoma of lung, squamous cell                       | AJCC G2: Moderately differentiated | I                      |
| 12     | M      | 63  | Lung / Lung                                     | Tumor      | Carcinoma of lung, large cell                 | Carcinoma of lung, large cell                          | AJCC G3: Poorly differentiated     | I                      |
| 13     | F      | 45  | Lung / Lung                                     | Tumor      | Adenocarcinoma of lung, mucinous              | Adenocarcinoma of lung, mucinous                       | AJCC G2: Moderately differentiated | I                      |
| 14     | F      | 38  | Lung / Lung                                     | Tumor      | Carcinoma of lung, squamous cell              | Carcinoma of lung, squamous cell                       | Not Reported                       | I                      |
| 15     | M      | 74  | Lung / Lung                                     | Tumor      | Adenocarcinoma of lung                        | Adenocarcinoma of lung                                 | AJCC G3: Poorly differentiated     | I                      |
| 16     | F      | 62  | Lung / Lung                                     | Tumor      | Adenocarcinoma of lung                        | Adenocarcinoma of lung                                 | AJCC G1: Well differentiated       | I                      |
| 17     | F      | 66  | Lung / Lung                                     | Tumor      | Adenocarcinoma of lung                        | Adenocarcinoma of lung                                 | AJCC G2: Moderately differentiated | I                      |
| 18     | F      | 81  | Lung / Lung                                     | Tumor      | Adenocarcinoma of lung, bronchioloalveolar    | Adenocarcinoma of lung, bronchioloalveolar             | AJCC G1: Well differentiated       | I                      |
| 19     | M      | 54  | Lung / Lung                                     | Tumor      | Adenocarcinoma of lung                        | Adenocarcinoma of lung                                 | AJCC G2: Moderately differentiated | II                     |
| 20     | M      | 78  | Lung: left lower lobe / Lung: left lower lobe   | Tumor      | Carcinoma of lung, large cell, neuroendocrine | Carcinoma of lung, large cell, neuroendocrine          | AJCC G3: Poorly differentiated     | II                     |
| 21     | F      | 84  | Lung: right upper lobe / Lung: right upper lobe | Tumor      | Adenocarcinoma of lung                        | Adenocarcinoma of lung                                 | AJCC G2: Moderately differentiated | II                     |
| 22     | M      | 77  | Lung: left lower lobe / Lung: left lower lobe   | Tumor      | Adenocarcinoma of lung                        | Adenocarcinoma of lung                                 | AJCC G3: Poorly differentiated     | II                     |
| 23     | F      | 67  | Lung / Lung                                     | Tumor      | Carcinoma of lung, squamous cell              | Carcinoma of lung, squamous cell                       | AJCC G3: Poorly differentiated     | II                     |
| 24     | M      | 80  | Lung / Lung                                     | Tumor      | Carcinoma of lung, squamous cell              | Carcinoma of lung, squamous cell                       | AJCC G3: Poorly differentiated     | II                     |
| 25     | M      | 69  | Lung / Lung                                     | Tumor      | Carcinoma of lung, squamous cell              | Carcinoma of lung, squamous cell                       | AJCC G3: Poorly differentiated     | II                     |
| 26     | M      | 51  | Lung / Lung                                     | Tumor      | Carcinoma of lung, squamous cell              | Carcinoma of lung, squamous cell                       | Not Reported                       | II                     |
| 27     | F      | 77  | Lung / Lung                                     | Tumor      | Carcinoma of lung, squamous cell              | Carcinoma of lung, squamous cell                       | AJCC G2: Moderately differentiated | II                     |
| 28     | F      | 68  | Lung / Lung                                     | Tumor      | Adenocarcinoma of lung                        | Adenocarcinoma of lung                                 | AJCC G3: Poorly differentiated     | II                     |
| 29     | F      | 51  | Lung / Lung                                     | Tumor      | Carcinoma of lung, squamous cell              | Carcinoma of lung, squamous cell                       | AJCC G2: Moderately differentiated | II                     |
| 30     | M      | 75  | Lung: right upper lobe / Lung: right upper lobe | Tumor      | Adenocarcinoma of lung                        | Adenocarcinoma of lung                                 | AJCC G3: Poorly differentiated     | II                     |
| 31     | F      | 77  | Lung / Lung                                     | Tumor      | Adenocarcinoma of lung                        | Adenocarcinoma of lung                                 | AJCC G2: Moderately differentiated | II                     |
| 32     | F      | 73  | Lung / Lung                                     | Tumor      | Carcinoma of lung, non-small cell             | Carcinoma of lung, non-small cell                      | AJCC G3: Poorly differentiated     | III                    |
| 33     | M      | 47  | Lung / Lung                                     | Tumor      | Adenocarcinoma of lung                        | Adenocarcinoma of lung                                 | Not Reported                       | III                    |
| 34     | F      | 68  | Lung: right upper lobe / Lung: right upper lobe | Tumor      | Adenocarcinoma of lung                        | Adenocarcinoma of lung, acinar                         | Not Reported                       | III                    |
| 35     | F      | 72  | Lung / Lung                                     | Tumor      | Adenocarcinoma of lung                        | Adenocarcinoma of lung                                 | AJCC G3: Poorly differentiated     | III                    |
| 36     | M      | 55  | Lung / Lung                                     | Tumor      | Adenocarcinoma of lung                        | Adenocarcinoma of lung                                 | AJCC G3: Poorly differentiated     | III                    |
| 37     | F      | 64  | Lung: left lower lobe / Lung: left lower lobe   | Tumor      | Adenocarcinoma of lung                        | Adenocarcinoma of lung                                 | AJCC G2: Moderately differentiated | III                    |
| 38     | M      | 65  | Lung: left lower lobe / Lung: left lower lobe   | Tumor      | Carcinoma of lung, squamous cell              | Carcinoma of lung, squamous cell                       | AJCC G2: Moderately differentiated | III                    |
| 39     | F      | 73  | Lung / Lung                                     | Tumor      | Carcinoma of lung, squamous cell              | Carcinoma of lung, squamous cell                       | AJCC G3: Poorly differentiated     | III                    |
| 40     | M      | 52  | Lung / Lung                                     | Tumor      | Carcinoma of lung, adenosquamous              | Carcinoma of lung, adenosquamous                       | AJCC G3: Poorly differentiated     | III                    |
| 41     | M      | 61  | Lung: left upper lobe / Lung: left upper lobe   | Tumor      | Carcinoma of lung, small cell                 | Carcinoma of lung                                      | AJCC G3: Poorly differentiated     | III                    |
| 42     | M      | 72  | Lung: left lower lobe / Lung: left lower lobe   | Tumor      | Carcinoma of lung, squamous cell              | Carcinoma of lung, squamous cell                       | AJCC G2: Moderately differentiated | III                    |
| 43     | M      | 51  | Lung / Lung                                     | Tumor      | Adenocarcinoma of lung                        | Adenocarcinoma of lung                                 | AJCC G2: Moderately differentiated | III                    |
| 44     | F      | 65  | Lung / Lung                                     | Tumor      | Adenocarcinoma of lung, bronchioloalveolar    | Adenocarcinoma of lung                                 | AJCC G1: Well differentiated       | III                    |
| 45     | M      | 63  | Lung / Lymph node                               | Tumor      | Carcinoma of lung, non-small cell, metastatic | Carcinoma of lung, non-small cell, metastatic          | AJCC G3: Poorly differentiated     | III                    |
| 46     | M      | 56  | Lung / Lung                                     | Tumor      | Adenocarcinoma of lung                        | Adenocarcinoma of lung                                 | AJCC G3: Poorly differentiated     | IV                     |
| 47     | M      | 77  | Lung / Lung                                     | Tumor      | Carcinoma of lung, squamous cell              | Carcinoma of lung, squamous cell                       | AJCC G3: Poorly differentiated     | IV                     |
| 48     | M      | 53  | Lung / Brain                                    | Tumor      | Adenocarcinoma of lung, metastatic            | Adenocarcinoma of lung, metastatic                     | Not Reported                       | IV                     |

Supplementary table 2

| Human         | forward                      | reverse                |
|---------------|------------------------------|------------------------|
| TNF- $\alpha$ | AACCTCCTCTGTGCCATCAA         | CCAAAGTAGACCTGCCCAGA   |
| IL-1 $\beta$  | ACGATGCACCTGTACGATCA         | TCTTTCAACACGCAGGACAG   |
| IL-6          | TACCCCAAGGAGAAGATTCC         | TTTTCTGCCAGTGCCTCTTT   |
| IL-8          | GTGCAGTTTTGCCAAGGAGT         | CTCTGCACCCAGTTTTCCCT   |
| IL-12A        | ACTAGAGAGACTTCTTCCACAACAAGAG | GCACAGGGTCATCATCAAAGAC |
| IL-23A        | GCAGATTCGAAGCCTCAGTC         | CCTTGAGCTGCTGCCTTTAG   |
| CCL2          | CCCCAGTCACCTGCTGTTAT         | TGGAATCCTGAACCCACTTC   |
| CCL13         | CTCCTCTGGCCTCCTCTTCT         | ACCGAATACAAACCCACTGC   |
| CCL18         | TGCCCAGCCACATTAACAAAC        | GGCACAATGTCTGCTGAGAA   |
| CCL19         | GGTGCCTGCTGTAGTGTTCA         | GGTCTTCTCTTGGTCCTC     |
| CCL20         | GCGCAAATCCAAACAGACT          | CAAGTCCAGTGAGGCACAAA   |
| CXCL11        | TCGAAGCAAGCAAGGCTTAT         | GTCCTTTACCCACCTTTCA    |
| CCR7          | ACATCGGAGACAAACACCACA        | GGAAGGGTCAGGAGGAAGAG   |
| NOS2          | ACAAGCCTACCCCTCCAGAT         | TCCCGTCAGTTGGTAGGTTT   |
| MMP9          | CTCGAAGTTTGCAGCGGACA         | GCCATTACGTCGTCCTTAT    |
| INDO          | GATGAAGAAGTGGGCTTTGC         | CGGACATCTCCATGACCTTT   |
| MRC1          | TGACACACTTTTGGGGATCA         | AAACTTGAACGGGAATGCAC   |
| MAF           | AGAGACACGCTCTGGAGTCG         | GCTTCCAAAATGTGGCGTAT   |
| ARG1          | GGCTGGTCTGCTTGAGAAAC         | TTCCACAGACCTTGGATTCT   |
| USP17         | CAAACATGTCAGCGTCCCAA         | ATTTGGTGGATGAGGGTGGT   |
| GADPH         | GAGTCAACGGATTGGTCTGT         | GACAAGCTTCCCGTTCTCAG   |
| FLG2          | AGGTCCAGCTGTGGTCAATTC        | TGCCCACTAGTCTCCAATCC   |
| c-MYC         | TTCCGGTAGTGGAAAACCCAG        | CAGCAGCTCGAATTTCTTCC   |
| SOX-2         | ACACCAATCCATCCCACT           | GCAAACCTTCTGCAAAGCTC   |
| OCT-4         | GAAGGATGTGGTCCGAGTGT         | GTGAAGTGAGGGCTCCATA    |
| KLF-4         | ACCCACACAGGTGAGAAACC         | ATGTGTAAGGGCAGGTTGGTC  |
| NANOG         | TTCCCTTCCCTCCATGGATCTG       | ATCTGCTGGAGGCTGAGGTA   |
| ALDH1         | TGTTAGCTGATGCCGACTTG         | CTTCTTAGCCCGCTCAACAC   |
| ABCG2         | GTGGCCTTGCTTGTATGAT          | AACAATTTGCTGCTGTGCAAC  |
| CD44          | AAGGTGGAGCAAAACACAACC        | AGCTTTTTCTTCTGCCACACA  |
| CD117         | AGAGACTTGGCAGCCAGAAA         | AGGGGCTGCTTCCCTAAAGAG  |
| CD133         | GCCACCGCTCTAGATACTGC         | TGTTGTGATGGGCTTGTGTCAT |
| Mouse         | forward                      | reverse                |
| TNF- $\alpha$ | AGCCCCAGTCTGTATCCTT          | CTCCCTTTGCAGAACTCAGG   |
| IL-1 $\beta$  | CAGGCAGGCAGTATCACTCA         | AGCTCATATGGGTCCGACAG   |
| IL-6          | AGTTGCCTTCTTTGGGACTGA        | TCCACGATTTCCACAGAGAAC  |
| IL-8          | CGTCCCTGTGACACTCAAGA         | TAATTGGGCCAACAGTAGACC  |
| IL-12A        | CTCCTGTGGGAGAAGCAGAC         | CAGATAGCCCATCACCTGT    |
| IL-23A        | AATAATGTGCCCGTATCCA          | CATGGGGGCTCAGGGAGTA    |
| CCL2          | CAGTCCCTGTCTATGCTTCT         | TCTGGACCCATTCTTCTTG    |
| CCL18         | GCAGTCTTTGAGGTGGAAGC         | CATCCATCCAAGATGTGCAG   |
| CCL19         | TTCCACAGCGGATTTAAGTG         | GCAAAGAGGCAGACAGACC    |
| CCL20         | CTTGCTTTGGCATGGTACT          | AGCCCTTTTCAACCAAGTCT   |
| CXCL11        | CAGTCTGGATTCAAAAGCA          | AACCCCTTGAAGGCCTCAG    |
| CCR7          | TGTACGAGTCCGTTGTGCTTC        | TAGGCCAGAAAGGGAAGAAT   |
| NOS2          | CACCTTGGAGTTCACCCAGT         | ACCCTCTACTTGGGATGC     |
| MMP9          | GAAGGCAAAACCCTGTGTGTT        | AGAGTACTGCTTGCCAGGA    |
| INDO          | AAGGGCTTCTTCTCTGCTC          | GCATTTCCAGCCAGACAGAT   |
| MRC1          | TGGCAAGTGTCCAGAGTCAG         | TCCCTTCAACATTTCCGGAAC  |
| MAF           | TCCTGAGTGGGCTTGCTAGT         | AAGTACGGGGGAATTCAGG    |
| ARG1          | CGCTTTTCTCAAAGGACAG          | GACATCAACAAAGGCCAGGT   |
| USP17         | GGTGGGAGATGAAGATCGAA         | CGTGAAGGGTAAGGCATTTGT  |
| GADPH         | ACCCAGAAGACTGTGGATGG         | CACATTTGGGGGTAGGAACAC  |
| FLG2          | CCAAAGTCTTTTCCATCCA          | CCAGAAGGTCCATACCAGCA   |
| MYC           | ACACGGAGGAAAACGACAAG         | TCGTCTGCTTGAATGGACAG   |
| SOX-2         | AAGGGTCTTGTCTGGGTTTT         | AGACCACGAAAACGGTCTTG   |
| OCT-4         | AAGCCCTCCCTACAGCAGAT         | CTGGGAAAGGTGTCCCTGTA   |
| KLF-4         | GCAGTCAAGTCCCCTCTC           | CTGTGTGAGTTCGAGGTTGT   |
| NANOG         | CCAGTGGAGTATCCCAGCAT         | GAAGTTATGGAGCGGAGCAG   |
| ALDH1         | GCACTCAATGGTGGGAAAGT         | TTTTGCCACACACTCCAATA   |
| ABCG2 -       | CCATTCATCAGCTCGGTAT          | AATCCGCAGGGTTGTTGTAG   |
| CD44          | TGGATCCGAATTAGCTGGAC         | AGCTTTTTCTTCTGCCACACA  |
| CD117         | GGGCTAGCCAGAGACATCAG         | AGGGAAGAGCTCCAGAGG     |
| CD133         | GAAAAGTTGCTCTGCGAACC         | TCTCAAGCTGAAAAGCAGCA   |



Supplementary figure 1

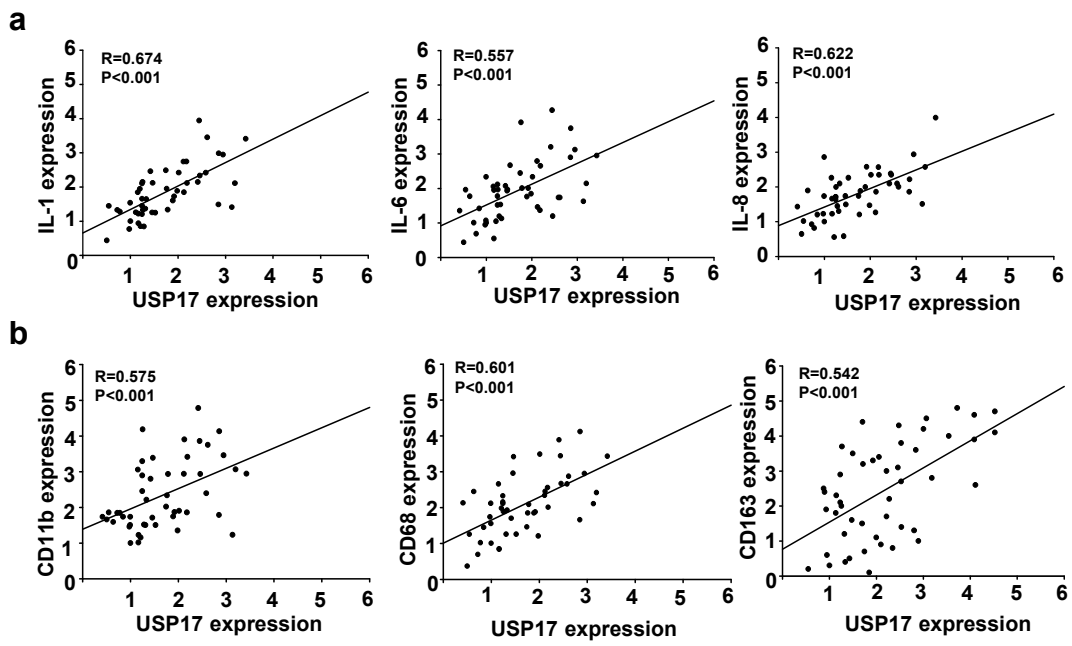

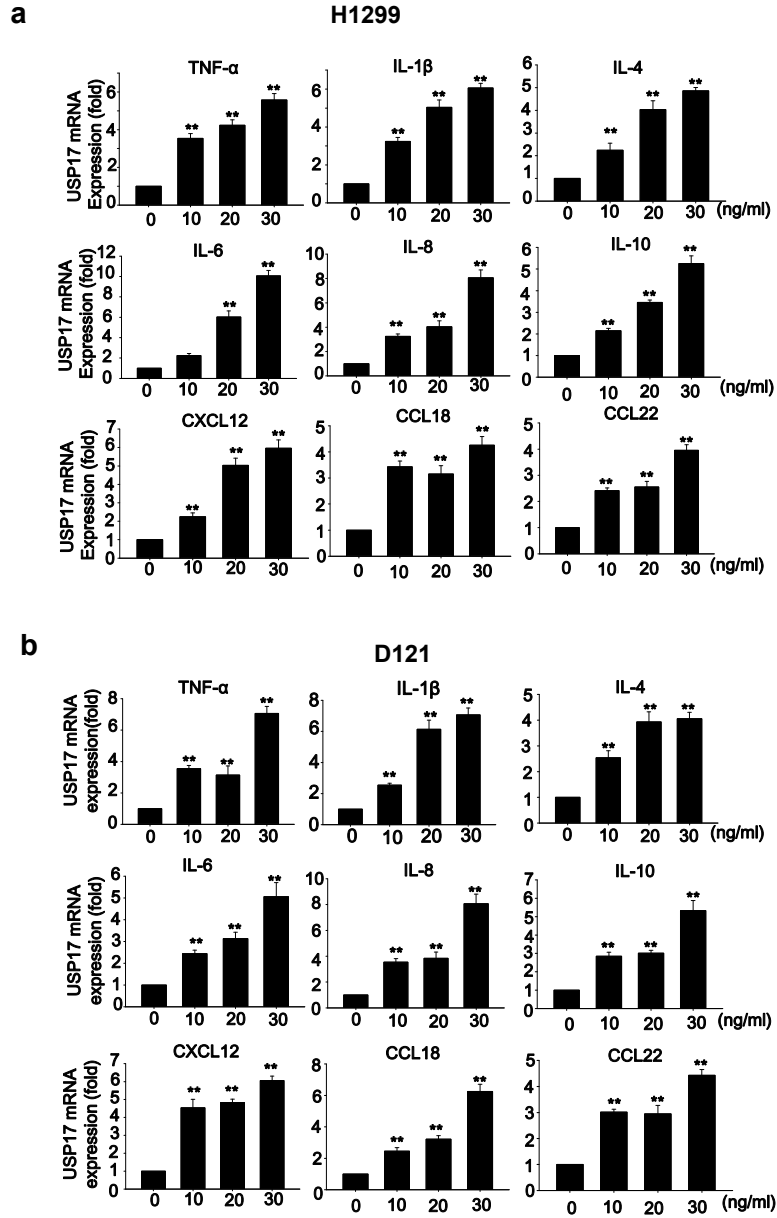

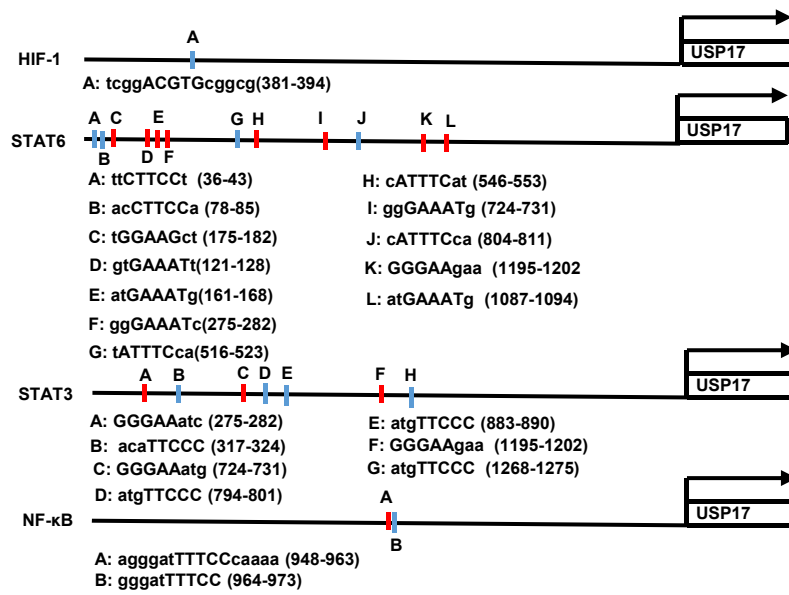

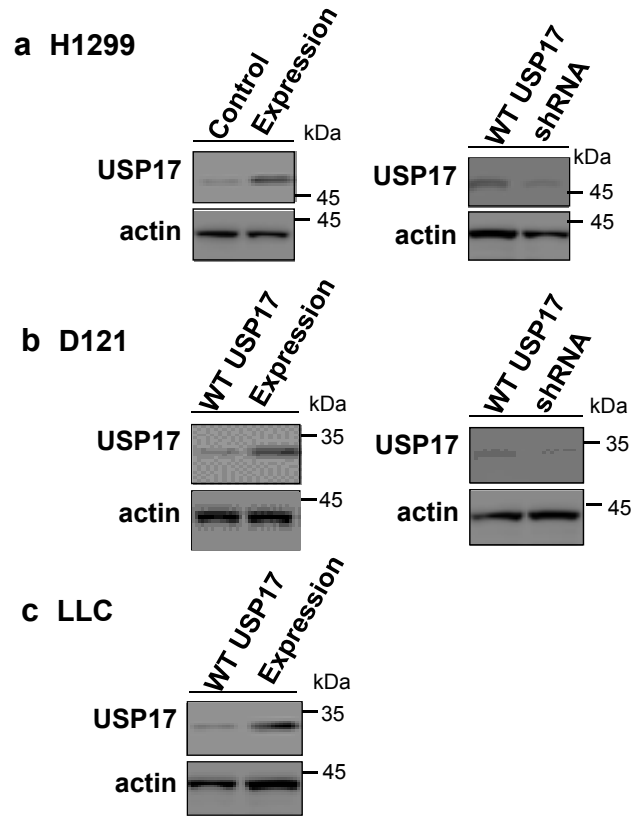

**a**

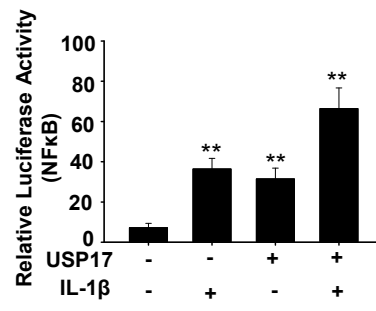

**b**

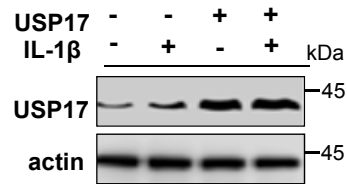

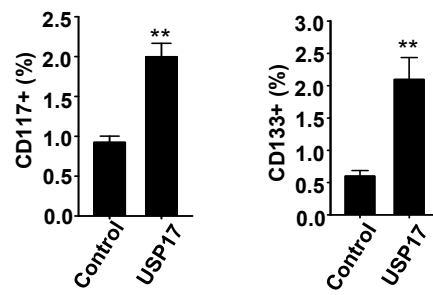

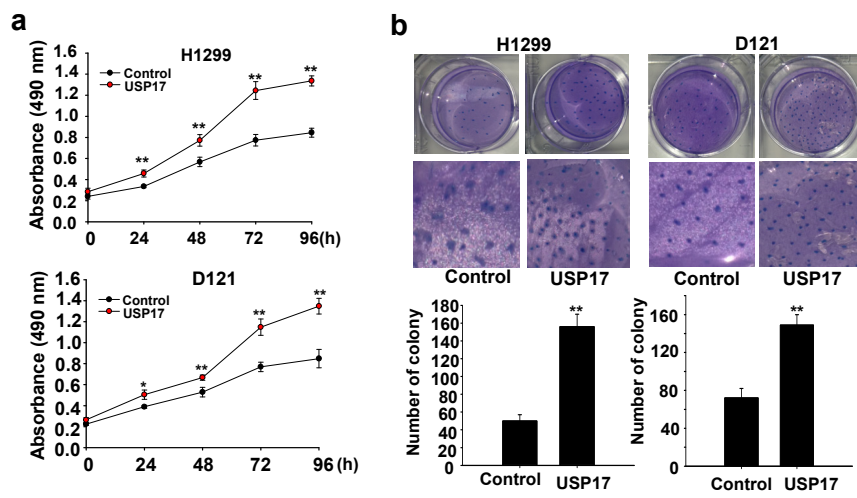

**a**

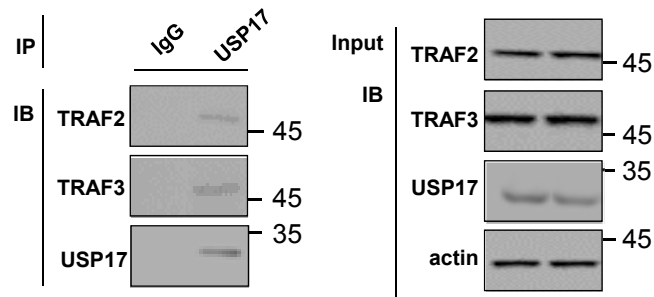

**b**

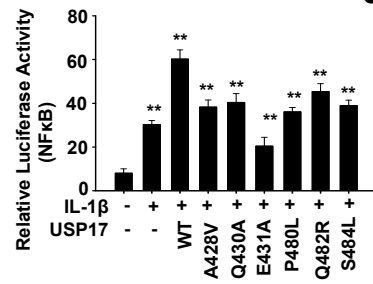

**c**

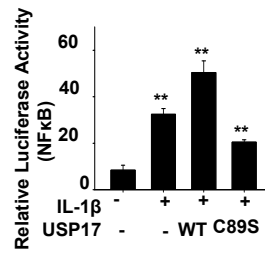



Supplementary figure 9

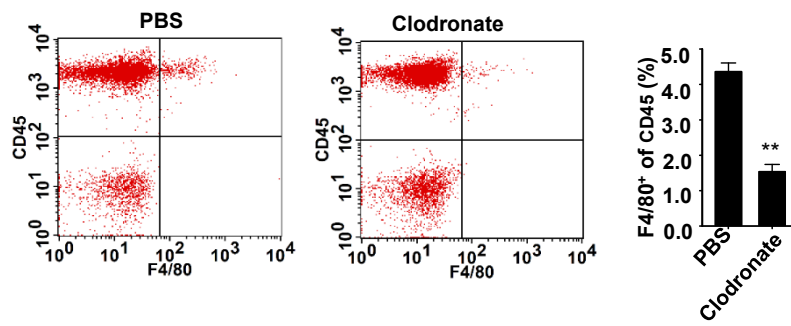

Supplement: 41388_2018_411_MOESM1_ESM.pdf [file 41388_2018_411_MOESM1_ESM.pdf]
